# Supplementary material
Source: PubMed Central journal article supplement (PMC3651422)
Supplement: 1221862110_pnas.201221862SI.pdf [file 1221862110_pnas.201221862SI.pdf]

# Supporting Information

Sui et al. 10.1073/pnas.1221862110

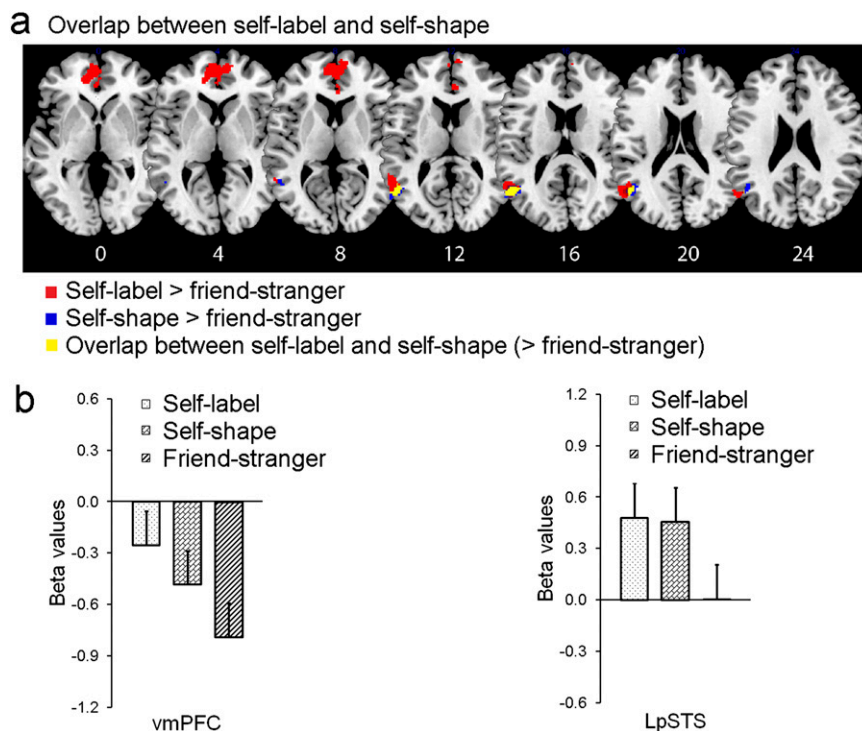

**Fig. S1.** Functional magnetic resonance imaging (fMRI) data for shape-label nonmatching pairs masked by self > stranger comparison for matched trials. (A) Self-label > friend-stranger in the ventral medial prefrontal cortex (vmPFC) and left posterior superior temporal sulcus (LpSTS), and self-shape > friend-stranger in the LpSTS. (B) Beta values of brain responses in the vmPFC and LpSTS. Error bars represent one SE.

**Table S1. Brain regions linked to the shape-label associations at  $P < 0.005$  uncorrected the whole brain and an extent threshold of  $>70$  voxels**

| Contrast                                          | Region      | K          | Anatomy       | BA   | Z     | MNI |      |    |
|---------------------------------------------------|-------------|------------|---------------|------|-------|-----|------|----|
|                                                   |             |            |               |      |       | x   | y    | z  |
| Matched self > stranger                           | Frontal     | 77         | vmPFC         | 10   | 3.06  | -6  | 54   | 4  |
|                                                   | Temporal    | 337        | LpSTS         | 37   | 3.98  | -58 | -62  | 14 |
| Matched self < stranger                           | Frontal     | 1,138*     | L DLPFC       | 6    | 4.66  | -28 | -2   | 64 |
|                                                   |             | 1,599*     | R DLPFC       | 6    | 4.31  | 24  | -10  | 62 |
|                                                   |             | 808*       | R SMA         | 32   | 4.94* | 4   | 12   | 50 |
|                                                   |             | 258*       | L MFC         | 44   | 3.53  | -46 | 22   | 42 |
|                                                   |             | 75         | L precentral  | 4    | 3.12  | -40 | -16  | 58 |
|                                                   | Parietal    | 344*       | L IPL/IPC     | 40   | 3.43  | -38 | -46  | 50 |
|                                                   |             | 301*       | R IPL/IPC     | 40   | 4.26  | 42  | -50  | 46 |
|                                                   |             | 457*       | R precuneus   | 7    | 3.66  | 8   | -62  | 52 |
|                                                   | Occipital   | 292*       | R cuneus      | 17   | 4.03  | 10  | -100 | 6  |
|                                                   | Subcortical | 831*       | L putamen     | 48   | 4.83* | -24 | 20   | 0  |
|                                                   |             | 659*       | L caudate     | —    | 4.20  | -20 | -18  | 22 |
|                                                   |             | 182        | R caudate     | —    | 3.47  | 24  | -16  | 24 |
|                                                   |             | 230        | R putamen     | 48   | 3.98  | 32  | 12   | 2  |
|                                                   |             | 110        | R hippocampus | —    | 3.96  | 28  | -32  | 2  |
|                                                   | 161         | R cingulum | —             | 3.28 | 16    | -22 | 40   |    |
| Nonmatching based on self-label > friend-stranger | Frontal     | 623*       | vmPFC         | 10   | 4.34  | 8   | 58   | 8  |
|                                                   | Temporal    | 308        | LpSTS         | 37   | 3.79  | -52 | -62  | 16 |
| Nonmatching based on self-shape > friend-stranger | Temporal    | 204        | LpSTS         | 37   | 3.88  | 52  | 64   | 16 |

BA, Brodmann area; DLPFC, dorsal-lateral prefrontal cortex; FA, fusiform area; IPC, inferior parietal cortex; K, the size of voxels; L, left; LpSTS, left posterior superior temporal sulcus; MFC, middle frontal cortex; MNI, Montreal Neurological Institute coordinates; MOC, middle occipital cortex; R, right; SMA, supplementary motor area; vmPFC, ventral medial prefrontal cortex.

\* $P < 0.05$  for FWE-correction.
